# Supplementary material
Source: publisher figshare collection journal article supplement (https://acs.figshare.com/ndownloader/files/10621897)
Supplement: Supplementary file 1 [file 10621897]

25
16b
8       -0.507679000     -1.013112000     -0.838472000
8        1.334754000     -1.748144000      0.389144000
8        1.394456000      1.100744000     -0.764713000
8       -0.503064000      2.109193000     -1.432816000
6       -2.677753000     -0.419106000     -0.127953000
1       -2.897255000     -0.139919000     -1.155045000
6       -0.137320000      1.539913000      0.898848000
1       -1.065217000      1.895113000      1.318899000
6        0.896174000      0.959833000      1.493957000
1        1.016647000      0.724151000      2.542931000
6       -3.384262000      0.078753000      0.878882000
1       -4.211718000      0.756436000      0.707545000
1       -3.158427000     -0.179277000      1.909744000
6       -1.553311000     -1.392232000      0.044271000
1       -1.197313000     -1.401298000      1.080857000
1       -1.886957000     -2.407911000     -0.216031000
6        1.950435000      0.655853000      0.467727000
1        2.855249000      1.247238000      0.659489000
6        0.152448000      1.638589000     -0.557096000
6        2.380693000     -0.804936000      0.384517000
1        3.004068000     -0.925799000     -0.510120000
1        2.991698000     -1.030458000      1.261792000
6        0.593159000     -1.860615000     -0.801464000
1        0.269639000     -2.906323000     -0.850839000
1        1.210258000     -1.597712000     -1.664495000
25
16c
8        0.657598000     -0.487170000     -1.048773000
8        0.621676000      1.700206000     -0.236642000
8       -2.045002000      0.155230000     -0.512898000
8       -2.063672000     -2.086892000     -0.705758000
6        2.387083000     -0.559651000      0.691490000
1        1.705009000     -0.385742000      1.518629000
6       -1.251943000     -1.006245000      1.309315000
1       -0.978473000     -1.875989000      1.887581000
6       -1.168419000      0.278245000      1.627849000
1       -0.796890000      0.716333000      2.544924000
6        3.672433000     -0.247403000      0.801226000
1        4.081472000      0.168031000      1.714374000
1        4.362377000     -0.402394000     -0.022958000
6        1.794067000     -1.176909000     -0.542573000
1        2.561074000     -1.253113000     -1.324212000
1        1.427895000     -2.184636000     -0.329640000
6       -1.681082000      1.104730000      0.483194000
1       -2.591121000      1.644654000      0.775224000
6       -1.810710000     -1.115316000     -0.064806000
6       -0.703276000      2.141602000     -0.063084000
1       -1.110509000      2.528155000     -1.005680000
1       -0.652323000      2.965912000      0.652444000
6        0.856328000      0.860622000     -1.340448000
1        1.893644000      1.041828000     -1.638473000
1        0.166155000      1.107920000     -2.152614000
25
16a
8        1.829642000      2.074790000     -1.024168000
6       -2.372846000      1.336240000      0.376824000
1       -3.058602000      1.280047000      1.219781000
6        1.495312000     -0.307634000      1.434449000
1        1.292655000     -0.756771000      2.398197000
6       -1.470526000      2.308374000      0.303853000
1       -0.776249000      2.379566000     -0.528893000
1       -1.404241000      3.077430000      1.065800000
6        1.793309000      1.101582000     -0.334323000
6       -2.546889000      0.286637000     -0.682878000
1       -1.766580000      0.374120000     -1.444217000
1       -3.520276000      0.396760000     -1.164657000
6        1.430810000      0.975586000      1.102282000
1        1.162098000      1.829125000      1.705151000
6        1.884830000     -1.111442000      0.227749000
1        2.818674000     -1.659623000      0.396264000
6       -1.366216000     -1.430927000      0.413049000
6        0.821568000     -2.101214000     -0.260597000
1        1.203750000     -2.577421000     -1.165450000
1        0.673235000     -2.877105000      0.503327000
8        2.109856000     -0.143200000     -0.788655000
8       -0.383639000     -1.475872000     -0.604582000
1       -1.048300000     -0.735487000      1.203688000
1       -1.525176000     -2.433057000      0.825888000
8       -2.564246000     -1.035818000     -0.144761000
25
36b
8        0.550270000      0.629047000     -1.001379000
8       -0.821115000      2.142233000      0.103616000
8       -1.800636000     -0.803047000     -0.256518000
8       -0.839771000     -2.558312000     -1.294547000
6        2.666806000     -0.116617000     -0.247107000
1        2.734422000     -0.812088000     -1.080370000
6        0.103186000     -1.639533000      0.706105000
1        0.938065000     -2.299371000      0.866586000
6       -0.315192000     -0.445374000      1.534882000
1       -0.145654000     -0.394963000      2.602904000
6        3.349434000     -0.325738000      0.872867000
1        4.006253000     -1.180179000      0.985924000
1        3.278133000      0.360882000      1.711162000
6        1.790773000      1.074849000     -0.467266000
1        1.629247000      1.613475000      0.472395000
1        2.258298000      1.760498000     -1.188917000
6       -1.648168000     -0.055310000      0.959935000
1       -2.458686000     -0.374027000      1.635712000
6       -0.837120000     -1.778259000     -0.378639000
6       -1.885013000      1.432003000      0.695184000
1       -2.788593000      1.514075000      0.077889000
1       -2.070374000      1.924468000      1.651543000
6       -0.383224000      1.661098000     -1.138812000
1        0.071445000      2.517407000     -1.647996000
1       -1.211419000      1.247729000     -1.719096000
25
36c
8        0.570813000     -0.575609000     -0.973012000
8        0.738005000      1.673528000     -0.397893000
8       -2.099284000      0.303536000     -0.356357000
8       -2.395021000     -1.900735000     -0.707936000
6        2.390150000     -0.570328000      0.665393000
1        1.731306000     -0.301493000      1.488402000
6       -1.163680000     -1.107088000      1.193676000
1       -0.685843000     -2.018075000      1.517200000
6       -0.920094000      0.291161000      1.685539000
1       -1.112950000      0.541719000      2.723834000
6        3.690152000     -0.312431000      0.728157000
1        4.138378000      0.145395000      1.601407000
1        4.351967000     -0.553799000     -0.098313000
6        1.738939000     -1.240937000     -0.509615000
1        2.459692000     -1.342773000     -1.331007000
1        1.396047000     -2.242824000     -0.238168000
6       -1.495420000      1.179789000      0.611720000
1       -2.305414000      1.791043000      1.030546000
6       -1.949572000     -1.021267000     -0.025082000
6       -0.536644000      2.164813000     -0.060488000
1       -1.042259000      2.567749000     -0.947892000
1       -0.359011000      2.983222000      0.639998000
6        0.774292000      0.729415000     -1.431586000
1        1.762714000      0.821179000     -1.892081000
1       -0.019479000      0.924138000     -2.158634000
25
36a
8        2.878026000      1.081793000     -1.081055000
6       -1.408994000      1.891247000      0.414045000
1       -1.934049000      1.981974000      1.363164000
6        0.929562000     -0.496279000      1.448438000
1        0.806574000     -0.798978000      2.480213000
6       -0.222462000      2.472179000      0.243169000
1        0.308673000      2.414538000     -0.702685000
1        0.231101000      3.070100000      1.025260000
6        2.239557000      0.383939000     -0.336222000
6       -2.145657000      1.176921000     -0.683317000
1       -1.458201000      0.898035000     -1.486438000
1       -2.915305000      1.834980000     -1.092850000
6        1.835057000      0.637409000      1.028276000
1        2.234122000      1.432242000      1.635957000
6        1.110392000     -1.516804000      0.363533000
1        1.818248000     -2.297817000      0.692767000
6       -2.072307000     -0.952072000      0.323910000
6       -0.141444000     -2.237447000     -0.137191000
1        0.157811000     -2.885382000     -0.962874000
1       -0.531885000     -2.870289000      0.672095000
8        1.713201000     -0.818223000     -0.733939000
8       -1.123185000     -1.368797000     -0.633538000
1       -1.550234000     -0.590368000      1.223167000
1       -2.740126000     -1.780487000      0.583732000
8       -2.864160000      0.034839000     -0.228888000
25
TS(36b-->3BR-6b)
8        0.799622000     -0.255323000     -1.362294000
8        1.202894000      1.633232000     -0.053440000
8       -1.680552000      0.686550000     -0.362651000
8       -2.329548000     -1.249816000     -1.316176000
6        1.571944000     -1.668622000      0.469454000
1        1.287276000     -2.715727000      0.504011000
6       -1.215113000     -1.226696000      0.810284000
1       -1.263414000     -2.270043000      1.073705000
6       -0.704477000     -0.098692000      1.638509000
1       -0.838721000     -0.091595000      2.714561000
6        1.634388000     -0.952083000      1.607849000
1        1.463105000     -1.420627000      2.570549000
1        1.992451000      0.071168000      1.600773000
6        1.865360000     -1.077317000     -0.887361000
1        2.788782000     -0.488915000     -0.840754000
1        2.000155000     -1.872582000     -1.622189000
6       -1.073032000      1.139394000      0.855074000
1       -1.837712000      1.707847000      1.405547000
6       -1.802181000     -0.683557000     -0.398033000
6        0.032530000      2.145202000      0.541077000
1       -0.402314000      2.925460000     -0.096685000
1        0.350072000      2.604927000      1.479969000
6        1.067820000      1.111249000     -1.353558000
1        2.021027000      1.314783000     -1.852462000
1        0.236519000      1.584900000     -1.880316000
25
TS(36b-->3BR-6b')
8       -0.054025000     -0.856882000     -1.119354000
8        1.707739000     -1.566014000      0.224610000
8        1.134717000      1.475506000     -0.288165000
8       -0.611405000      2.327316000     -1.423148000
6       -2.210551000     -0.627787000     -0.151541000
1       -2.517658000      0.041457000     -0.951481000
6       -0.949828000      1.182553000      0.669845000
1       -1.782576000      1.753087000      1.059646000
6        0.052962000      0.494528000      1.545670000
1       -0.090861000      0.246431000      2.586129000
6       -3.007572000     -0.836782000      0.920445000
1       -3.902558000     -0.249439000      1.084864000
1       -2.752476000     -1.580264000      1.668629000
6       -1.088432000     -1.573663000     -0.472741000
1       -0.717459000     -2.039740000      0.446306000
1       -1.458445000     -2.359889000     -1.145553000
6        1.395059000      0.806612000      0.955147000
1        1.964801000      1.509902000      1.582943000
6       -0.202942000      1.731208000     -0.467275000
6        2.316173000     -0.396918000      0.728624000
1        3.128465000     -0.072679000      0.065656000
1        2.743697000     -0.683865000      1.691361000
6        1.194803000     -1.481140000     -1.076076000
1        1.125121000     -2.513607000     -1.433716000
1        1.845703000     -0.882464000     -1.718918000
25
TS(36a-->3BR-6a)
8        2.876476000      0.506084000     -1.192415000
6       -0.805445000      2.000048000      0.447221000
1       -1.367786000      2.078890000      1.375035000
6        0.712199000     -0.487164000      1.438145000
1        0.441604000     -0.616696000      2.476666000
6        0.450561000      2.470521000      0.375049000
1        1.003459000      2.474958000     -0.559593000
1        0.899542000      2.990776000      1.212634000
6        2.134432000     -0.001735000     -0.394988000
6       -1.548431000      1.454413000     -0.739983000
1       -0.866799000      0.921157000     -1.410759000
1       -1.997132000      2.282217000     -1.294941000
6        1.797648000      0.423102000      0.954408000
1        2.476527000      1.000995000      1.561890000
6        0.725763000     -1.627144000      0.464607000
1        1.329524000     -2.462314000      0.863805000
6       -2.304228000     -0.555873000      0.241004000
6       -0.616803000     -2.219911000      0.040590000
1       -0.419020000     -3.016160000     -0.678626000
1       -1.099392000     -2.666949000      0.920551000
8        1.397878000     -1.119701000     -0.696184000
8       -1.455181000     -1.297935000     -0.603711000
1       -1.799719000     -0.368907000      1.200259000
1       -3.242088000     -1.094222000      0.408505000
8       -2.648286000      0.628892000     -0.386657000
25
3BR-6b
8        0.668732000     -0.198480000     -1.373523000
8        1.551421000      1.442779000      0.000444000
8       -1.503045000      0.993810000     -0.086720000
8       -2.735559000     -0.443591000     -1.300222000
6        1.421106000     -1.850255000      0.227331000
1        1.692247000     -2.895628000      0.311528000
6       -1.392640000     -1.202952000      0.537927000
1       -1.592382000     -2.262166000      0.481493000
6       -0.453998000     -0.527470000      1.464729000
1       -0.805984000     -0.645018000      2.496227000
6        1.001643000     -1.118340000      1.459522000
1        1.061369000     -1.813166000      2.298893000
1        1.699918000     -0.301815000      1.676151000
6        1.652146000     -1.190350000     -1.087053000
1        2.651388000     -0.726589000     -1.118578000
1        1.610346000     -1.932738000     -1.888932000
6       -0.671465000      0.968860000      1.079281000
1       -1.251741000      1.447462000      1.876746000
6       -1.968952000     -0.254665000     -0.397518000
6        0.531213000      1.880208000      0.873014000
1        0.142122000      2.847573000      0.531102000
1        1.015742000      2.034775000      1.840191000
6        1.142456000      1.112057000     -1.300222000
1        2.030211000      1.236206000     -1.928139000
1        0.325321000      1.752410000     -1.638575000
25
3BR-6b'
8        0.156711000     -0.905048000     -1.198641000
8        1.893370000     -1.309865000      0.305571000
8        0.859416000      1.683751000     -0.230534000
8       -0.952405000      2.037861000     -1.491896000
6       -1.883029000     -0.499240000     -0.030714000
1       -2.408803000     -0.138055000     -0.928323000
6       -1.165625000      0.742922000      0.562339000
1       -1.942291000      1.394190000      0.984517000
6       -0.068646000      0.466712000      1.523727000
1       -0.154945000     -0.071398000      2.455548000
6       -2.853521000     -1.078352000      0.940007000
1       -3.524392000     -0.432824000      1.491690000
1       -3.046817000     -2.143591000      0.957415000
6       -0.862802000     -1.554015000     -0.456400000
1       -0.435874000     -2.024340000      0.435188000
1       -1.342276000     -2.323120000     -1.072344000
6        1.215160000      1.006274000      0.982229000
1        1.655691000      1.765967000      1.641637000
6       -0.456610000      1.547528000     -0.526623000
6        2.319943000     -0.030813000      0.724556000
1        3.023501000      0.398919000      0.000632000
1        2.846822000     -0.200123000      1.665351000
6        1.441956000     -1.421871000     -1.014009000
1        1.467723000     -2.492561000     -1.238233000
1        2.083979000     -0.861521000     -1.699751000
25
3BR-6a
8        2.115301000      0.750185000     -1.562502000
6       -0.774816000      1.931837000      0.580951000
1       -1.445591000      2.298158000      1.350058000
6        0.837172000     -0.481029000      1.456534000
1        0.538418000     -0.532713000      2.493198000
6        0.699233000      2.036770000      0.781467000
1        1.166341000      2.634583000     -0.013099000
1        0.903032000      2.545136000      1.725259000
6        1.734893000      0.135614000     -0.614414000
6       -1.390778000      1.462868000     -0.693201000
1       -0.656485000      0.971682000     -1.339118000
1       -1.811398000      2.304213000     -1.254439000
6        1.463476000      0.683410000      0.786324000
1        2.460806000      0.895893000      1.202295000
6        0.877592000     -1.666590000      0.547117000
1        1.482108000     -2.486839000      0.956245000
6       -2.203766000     -0.575610000      0.181604000
6       -0.486611000     -2.238084000      0.138136000
1       -0.318265000     -3.084351000     -0.530939000
1       -1.008602000     -2.602102000      1.032636000
8        1.527279000     -1.199161000     -0.641449000
8       -1.245940000     -1.293343000     -0.570554000
1       -1.804360000     -0.379117000      1.187845000
1       -3.136805000     -1.143052000      0.248603000
8       -2.510087000      0.597743000     -0.481201000
25
1BR-6b
8       -0.675045000      0.236966000     -1.384348000
8       -1.680232000     -1.308753000      0.018584000
8        1.399120000     -1.094756000     -0.135841000
8        2.703472000      0.286723000     -1.339363000
6       -1.129529000      1.961791000      0.244826000
1       -1.273386000      3.032143000      0.335780000
6        1.472502000      1.085172000      0.560433000
1        1.815274000      2.107804000      0.584719000
6        0.508884000      0.443938000      1.498615000
1        0.890148000      0.492385000      2.524947000
6       -0.870480000      1.166385000      1.493773000
1       -0.876800000      1.854371000      2.341184000
1       -1.672762000      0.440642000      1.665954000
6       -1.515889000      1.337189000     -1.050128000
1       -2.562788000      0.994468000     -1.013489000
1       -1.434838000      2.070109000     -1.856952000
6        0.599296000     -1.047857000      1.051535000
1        1.159371000     -1.599283000      1.815677000
6        1.947675000      0.125765000     -0.422558000
6       -0.677508000     -1.853062000      0.850413000
1       -0.377922000     -2.838799000      0.472219000
1       -1.149405000     -1.995615000      1.825787000
6       -1.289190000     -1.011343000     -1.295525000
1       -2.209434000     -1.033212000     -1.887305000
1       -0.560538000     -1.734322000     -1.669083000
25
1BR-6b''
8       -0.437868000      0.636141000     -1.431100000
8       -2.024401000     -0.111001000      0.107761000
8        0.719023000     -1.779877000     -0.391665000
8        2.460326000     -0.531337000     -1.026350000
6        0.763174000      1.579549000      0.563795000
1        1.664446000      2.196286000      0.636111000
6        1.187143000      0.111084000      0.956373000
1        2.085093000      0.202973000      1.576070000
6        0.166179000     -0.745421000      1.605547000
1       -0.359822000     -0.521270000      2.520069000
6       -0.258734000      2.143327000      1.491177000
1       -0.210054000      3.188444000      1.767506000
1       -1.154779000      1.587260000      1.730955000
6        0.352342000      1.697815000     -0.929321000
1       -0.161151000      2.654627000     -1.082745000
1        1.253325000      1.679739000     -1.542051000
6       -0.281736000     -1.784106000      0.633953000
1       -0.291242000     -2.796257000      1.051816000
6        1.560557000     -0.728466000     -0.268644000
6       -1.687754000     -1.487256000      0.077688000
1       -1.767809000     -1.892996000     -0.937317000
1       -2.415545000     -1.987722000      0.720198000
6       -1.784093000      0.593390000     -1.078204000
1       -2.186134000      1.597921000     -0.912709000
1       -2.295436000      0.100089000     -1.911245000
25
1BR-6b'
8        0.164166000     -0.882559000     -1.201186000
8        1.914203000     -1.297560000      0.282263000
8        0.842353000      1.687383000     -0.222964000
8       -0.990157000      2.053634000     -1.451592000
6       -1.887181000     -0.529208000     -0.038539000
1       -2.401255000     -0.135586000     -0.923132000
6       -1.168625000      0.730081000      0.587491000
1       -1.961048000      1.354565000      1.014904000
6       -0.064015000      0.450629000      1.528183000
1       -0.122781000     -0.135198000      2.433173000
6       -2.865856000     -1.125868000      0.900026000
1       -3.818814000     -0.646269000      1.078833000
1       -2.603884000     -1.982825000      1.508639000
6       -0.846916000     -1.557878000     -0.470561000
1       -0.413579000     -2.030731000      0.417381000
1       -1.308606000     -2.329696000     -1.096000000
6        1.211524000      1.005428000      0.982127000
1        1.646917000      1.764794000      1.645979000
6       -0.478238000      1.553100000     -0.500128000
6        2.326381000     -0.018077000      0.715662000
1        3.028180000      0.425118000     -0.001948000
1        2.852284000     -0.191663000      1.656438000
6        1.453721000     -1.392407000     -1.036199000
1        1.486697000     -2.459223000     -1.278094000
1        2.086603000     -0.815271000     -1.716728000
25
1BR-6a
8       -2.309499000     -0.290683000     -1.546135000
6        0.370732000     -1.971147000      0.579449000
1        0.963946000     -2.503977000      1.314837000
6       -0.657405000      0.507596000      1.437743000
1       -0.347256000      0.467027000      2.471974000
6       -1.118767000     -1.898695000      0.742823000
1       -1.647565000     -2.410461000     -0.072488000
1       -1.409376000     -2.390756000      1.672325000
6       -1.771493000      0.191589000     -0.598149000
6        1.040863000     -1.620168000     -0.706232000
1        0.422257000     -0.957251000     -1.319261000
1        1.232257000     -2.522797000     -1.298177000
6       -1.604042000     -0.437492000      0.783236000
1       -2.608783000     -0.404059000      1.232714000
6       -0.508958000      1.727541000      0.586713000
1       -0.968537000      2.612257000      1.050308000
6        2.335288000      0.168127000      0.143474000
6        0.923575000      2.101876000      0.189641000
1        0.882631000      2.994512000     -0.437303000
1        1.491923000      2.345911000      1.096711000
8       -1.243474000      1.436833000     -0.610508000
8        1.544681000      1.097750000     -0.569394000
1        1.946650000      0.066216000      1.166539000
1        3.377588000      0.498112000      0.164076000
8        2.333981000     -1.045162000     -0.523269000
25
TS(1BR-6b-->22)
8       -0.697185000      0.299715000     -1.402543000
8       -1.783917000     -1.161180000      0.036148000
8        1.291640000     -1.180998000     -0.199802000
8        2.661948000      0.150590000     -1.386083000
6       -0.863298000      2.015673000      0.290805000
1       -0.824006000      3.094673000      0.386784000
6        1.548126000      0.957490000      0.582656000
1        2.014592000      1.925789000      0.675750000
6        0.567179000      0.343786000      1.528037000
1        0.967159000      0.319325000      2.547473000
6       -0.736524000      1.183964000      1.541886000
1       -0.682260000      1.859729000      2.397927000
1       -1.616262000      0.549287000      1.687875000
6       -1.390395000      1.474706000     -0.992997000
1       -2.465146000      1.249201000     -0.899719000
1       -1.271667000      2.216198000     -1.786399000
6        0.531522000     -1.127235000      1.012993000
1        1.068936000     -1.753407000      1.734725000
6        1.921052000      0.007275000     -0.454746000
6       -0.810424000     -1.818795000      0.818974000
1       -0.605926000     -2.811253000      0.397513000
1       -1.268140000     -1.957449000      1.801743000
6       -1.424347000     -0.883208000     -1.291337000
1       -2.369197000     -0.811155000     -1.839513000
1       -0.785326000     -1.667884000     -1.703552000
25
TS(1BR-6b''-->22)
8       -0.433550000      0.670166000     -1.413837000
8       -2.041242000     -0.187401000      0.055148000
8        0.770573000     -1.697652000     -0.437476000
8        2.428000000     -0.381441000     -1.159694000
6        0.669328000      1.598093000      0.624805000
1        1.461558000      2.346327000      0.770064000
6        1.265329000      0.181632000      0.910719000
1        2.199548000      0.286092000      1.469796000
6        0.272953000     -0.697335000      1.601978000
1        0.133111000     -0.772660000      2.668353000
6       -0.425257000      1.835105000      1.625316000
1       -0.193867000      1.823576000      2.682378000
1       -1.380317000      2.245044000      1.324598000
6        0.218873000      1.785728000     -0.831603000
1       -0.422238000      2.674736000     -0.897123000
1        1.097114000      1.942906000     -1.457953000
6       -0.184117000     -1.741976000      0.634665000
1       -0.131179000     -2.753422000      1.050910000
6        1.581737000     -0.617979000     -0.353625000
6       -1.622073000     -1.534439000      0.122764000
1       -1.720344000     -2.026342000     -0.852982000
1       -2.296987000     -2.017927000      0.832334000
6       -1.786158000      0.475362000     -1.148323000
1       -2.314599000      1.431713000     -1.074327000
1       -2.165740000     -0.114565000     -1.989360000
25
TS(1BR-6a-->21)
8        2.337972000      0.225627000     -1.544149000
6       -0.325182000      1.937532000      0.588952000
1       -0.911876000      2.455983000      1.339996000
6        0.634337000     -0.488334000      1.432552000
1        0.336525000     -0.438618000      2.470208000
6        1.169690000      1.878206000      0.727783000
1        1.685603000      2.379811000     -0.101343000
1        1.473874000      2.379337000      1.647998000
6        1.780270000     -0.231364000     -0.595115000
6       -1.002204000      1.629652000     -0.704133000
1       -0.401888000      0.957345000     -1.325818000
1       -1.160999000      2.548132000     -1.281878000
6        1.629291000      0.411936000      0.781353000
1        2.628442000      0.346608000      1.238815000
6        0.463371000     -1.716558000      0.596358000
1        0.906485000     -2.602507000      1.074197000
6       -2.357179000     -0.120449000      0.130335000
6       -0.973191000     -2.073888000      0.201240000
1       -0.943783000     -2.973999000     -0.415523000
1       -1.545519000     -2.300363000      1.110375000
8        1.206741000     -1.456429000     -0.602512000
8       -1.580957000     -1.070843000     -0.569898000
1       -1.983381000     -0.030327000      1.159696000
1       -3.408387000     -0.421131000      0.132155000
8       -2.312546000      1.094063000     -0.534045000
25
22
8       -0.470341000      1.155058000     -1.094128000
8       -2.112738000     -0.139323000     -0.052107000
8        0.683429000     -1.355313000     -0.913626000
8        2.321084000      0.027453000     -1.553623000
6        0.589166000      1.304461000      1.126340000
1        1.130385000      2.069196000      1.686605000
6        1.501617000      0.092031000      0.740398000
1        2.508729000      0.155913000      1.147609000
6        0.513337000     -0.865518000      1.429414000
1        0.930140000     -1.566096000      2.151764000
6       -0.221771000      0.350542000      2.045823000
1        0.075934000      0.476671000      3.087620000
1       -1.305403000      0.386719000      1.975797000
6       -0.126777000      2.015464000     -0.020676000
1       -1.018683000      2.528359000      0.362534000
1        0.546388000      2.760579000     -0.450307000
6       -0.112012000     -1.645001000      0.244365000
1        0.006907000     -2.719332000      0.414266000
6        1.573517000     -0.351561000     -0.706802000
6       -1.598034000     -1.456443000     -0.052342000
1       -1.809000000     -1.940596000     -1.014724000
1       -2.157830000     -1.981481000      0.725571000
6       -1.775243000      0.673731000     -1.138072000
1       -2.493434000      1.499757000     -1.109610000
1       -1.848404000      0.121074000     -2.079938000
25
21
8        2.792461000     -0.508199000     -1.303367000
6       -0.018918000      1.423069000      0.556271000
1       -0.577351000      2.080593000      1.226296000
6        0.407203000      0.077314000      1.251146000
1        0.248700000      0.113630000      2.329007000
6        1.484510000      1.788931000      0.417282000
1        1.819184000      2.128553000     -0.564967000
1        1.817060000      2.497051000      1.175268000
6        1.958746000     -0.550083000     -0.452923000
6       -0.729861000      1.402529000     -0.790833000
1       -0.342280000      0.608758000     -1.438682000
1       -0.555961000      2.360820000     -1.283450000
6        1.847729000      0.337284000      0.778856000
1        2.694518000      0.157177000      1.441633000
6        0.114798000     -1.318419000      0.695599000
1        0.514145000     -2.039155000      1.423424000
6       -2.581283000      0.188862000      0.019440000
6       -1.299019000     -1.786275000      0.399235000
1       -1.232983000     -2.777429000     -0.052660000
1       -1.826731000     -1.888403000      1.357226000
8        0.924044000     -1.426383000     -0.487882000
8       -2.035753000     -0.997308000     -0.500334000
1       -2.326406000      0.273949000      1.087700000
1       -3.665079000      0.171463000     -0.103879000
8       -2.139531000      1.298606000     -0.688587000
26
15b
8       -0.232286000      1.868818000      0.540875000
8       -1.246304000     -0.451881000     -1.034782000
8       -0.927892000     -2.563331000     -0.326976000
6        2.081059000     -1.362084000     -0.358999000
1        1.473834000     -1.856135000     -1.115288000
6       -2.241477000     -0.984817000      0.972187000
1       -2.484808000     -1.596363000      1.826906000
6       -2.590650000      0.266948000      0.706503000
1       -3.192995000      0.931374000      1.311287000
6        2.171798000     -1.901474000      0.851079000
1        1.662347000     -2.828754000      1.086079000
1        2.741683000     -1.418498000      1.638806000
6        2.700047000     -0.049724000     -0.749564000
1        3.418264000      0.275716000      0.004190000
1        3.224196000     -0.148644000     -1.704104000
6       -2.003710000      0.677906000     -0.614931000
1       -2.792170000      0.851955000     -1.357302000
6       -1.404051000     -1.487319000     -0.145518000
6       -1.131390000      1.924674000     -0.547934000
1       -0.625791000      2.083193000     -1.501647000
1       -1.776250000      2.785304000     -0.357212000
6        1.041158000      1.385611000      0.453135000
8        1.675741000      1.329054000      1.462286000
6        1.604108000      1.012415000     -0.906866000
1        2.005686000      1.933760000     -1.344891000
1        0.830574000      0.632987000     -1.572591000
26
15a
8        2.662879000      1.758325000     -0.295910000
6       -1.502402000      2.078212000      0.352137000
1       -1.827289000      2.234819000      1.380057000
6        1.328031000     -1.047938000      1.187220000
1        0.918052000     -1.709503000      1.936719000
6       -0.331209000      2.559952000     -0.046460000
1        0.025132000      2.414118000     -1.061664000
1        0.320402000      3.112799000      0.620005000
6        2.200369000      0.700932000      0.005363000
6       -2.446217000      1.315394000     -0.532318000
1       -2.011558000      1.201452000     -1.527093000
1       -3.377495000      1.880553000     -0.642953000
6        1.730121000      0.209191000      1.324395000
1        1.745389000      0.829506000      2.207131000
6        1.496008000     -1.460367000     -0.248552000
1        2.227651000     -2.272479000     -0.338678000
6       -1.651108000     -1.020522000      0.164059000
6        0.227853000     -1.911928000     -0.959136000
1        0.444658000     -2.030769000     -2.019836000
1       -0.111545000     -2.858044000     -0.533449000
6       -2.805967000     -0.057643000      0.044020000
1       -3.246405000      0.027701000      1.038690000
1       -3.544960000     -0.548858000     -0.598016000
8        2.028976000     -0.311320000     -0.896050000
8       -0.814774000     -0.943298000     -0.890532000
8       -1.506444000     -1.812831000      1.056832000
26
35b
8       -0.880947000     -1.981869000      0.297894000
8        1.275100000     -0.102525000     -0.946441000
8        2.261025000      1.898882000     -0.614266000
6       -0.975197000      2.059495000     -0.193487000
1       -0.230080000      2.325964000     -0.940319000
6        2.426224000      0.132928000      1.019187000
1        3.232977000      0.486828000      1.641888000
6        1.704095000     -1.162594000      1.072438000
1        0.888408000     -1.279997000      1.783170000
6       -0.725403000      2.310905000      1.087852000
1        0.196674000      2.796424000      1.389511000
1       -1.435567000      2.040941000      1.863319000
6       -2.205123000      1.356182000     -0.697064000
1       -3.003249000      1.397797000      0.045350000
1       -2.562390000      1.836766000     -1.611111000
6        1.401679000     -1.433424000     -0.378287000
1        2.244255000     -1.917305000     -0.888508000
6        2.016584000      0.796783000     -0.211447000
6        0.139898000     -2.235820000     -0.650654000
1       -0.191352000     -2.068838000     -1.677675000
1        0.370316000     -3.295204000     -0.532768000
6       -1.691857000     -0.885820000      0.280821000
8       -2.282088000     -0.628838000      1.287562000
6       -1.884261000     -0.112868000     -1.010165000
1       -2.722533000     -0.593535000     -1.527370000
1       -1.012013000     -0.169636000     -1.658651000
26
35a
8        3.297794000      0.916454000     -0.688253000
6       -1.017939000      2.153530000      0.376293000
1       -1.465970000      2.283587000      1.360890000
6        0.825423000     -0.706666000      1.294542000
1        0.401092000     -1.073736000      2.216553000
6        0.265228000      2.465181000      0.196990000
1        0.746902000      2.359745000     -0.770824000
1        0.864224000      2.878832000      0.999749000
6        2.475827000      0.223336000     -0.147022000
6       -1.936590000      1.683796000     -0.715729000
1       -1.355640000      1.422834000     -1.602365000
1       -2.604795000      2.507285000     -0.989910000
6        1.935713000      0.312333000      1.189956000
1        2.372795000      0.906591000      1.975410000
6        1.047651000     -1.585711000      0.102217000
1        1.637843000     -2.478276000      0.372804000
6       -1.995740000     -0.713131000      0.082635000
6       -0.201118000     -2.076614000     -0.614205000
1        0.084382000     -2.480228000     -1.584536000
1       -0.694147000     -2.841845000     -0.013371000
6       -2.811404000      0.496123000     -0.293150000
1       -3.432998000      0.744251000      0.567927000
1       -3.468954000      0.210951000     -1.119158000
8        1.841184000     -0.803043000     -0.805033000
8       -1.100391000     -1.007033000     -0.881587000
8       -2.114467000     -1.350510000      1.093831000
26
TS(35b-->3BR-5b)
8        1.645859000      1.372366000      0.232591000
8       -1.416187000      0.757092000     -0.960566000
8       -2.960046000     -0.886089000     -1.073424000
6        0.095990000     -1.900694000      0.578041000
1       -0.782023000     -2.540652000      0.568636000
6       -2.140941000     -0.079037000      1.038076000
1       -2.732945000     -0.660801000      1.726167000
6       -1.027161000      0.861763000      1.343476000
1       -0.915206000      1.366696000      2.293672000
6        0.336878000     -1.168533000      1.691956000
1       -0.286068000     -1.312230000      2.567733000
1        1.248229000     -0.602634000      1.840240000
6        0.969980000     -1.952709000     -0.651363000
1        1.891855000     -2.487112000     -0.397074000
1        0.463596000     -2.532481000     -1.424061000
6       -0.848694000      1.607582000      0.050631000
1       -1.472327000      2.517994000      0.065482000
6       -2.281068000     -0.159308000     -0.394820000
6        0.555203000      2.072062000     -0.349956000
1        0.621144000      2.082851000     -1.440819000
1        0.689502000      3.093138000      0.006114000
6        2.151895000      0.212283000     -0.251117000
8        3.191263000     -0.176831000      0.198439000
6        1.365071000     -0.592567000     -1.262774000
1        2.041424000     -0.780741000     -2.099424000
1        0.482783000     -0.081375000     -1.635878000
26
TS(35b-->3BR-5b')
8        1.604230000      1.343987000      0.243149000
8       -1.562497000      1.023234000     -0.803556000
8       -2.660845000     -0.909304000     -1.178549000
6        0.102319000     -1.913610000      0.646494000
1       -0.677050000     -2.655817000      0.793416000
6       -1.782574000     -0.372641000      0.996324000
1       -2.309018000     -1.079254000      1.617268000
6       -0.995113000      0.789388000      1.459983000
1       -0.974751000      1.157184000      2.475121000
6        0.665365000     -1.360665000      1.752298000
1        0.248940000     -1.580761000      2.729133000
1        1.548636000     -0.736901000      1.732941000
6        0.637342000     -1.850344000     -0.766808000
1        1.501909000     -2.522866000     -0.801083000
1       -0.115668000     -2.263119000     -1.440535000
6       -0.899801000      1.706762000      0.271358000
1       -1.465790000      2.631954000      0.446516000
6       -2.098748000     -0.185178000     -0.396810000
6        0.508668000      2.153556000     -0.168859000
1        0.501138000      2.288557000     -1.253657000
1        0.720608000      3.117574000      0.292834000
6        2.015970000      0.225251000     -0.402856000
8        3.098684000     -0.211666000     -0.137200000
6        1.071094000     -0.484838000     -1.343727000
1        1.634984000     -0.680921000     -2.257664000
1        0.202362000      0.108293000     -1.609430000
26
TS(35a-->3BR-5a)
8        3.182395000      0.526386000     -0.930054000
6       -0.653721000      2.113385000      0.416723000
1       -1.245603000      2.128483000      1.330637000
6        0.684333000     -0.574018000      1.330512000
1        0.150943000     -0.676757000      2.261929000
6        0.642435000      2.468597000      0.470604000
1        1.253788000      2.528684000     -0.424727000
1        1.070942000      2.858254000      1.386067000
6        2.340288000     -0.011529000     -0.263683000
6       -1.382141000      1.762430000     -0.851117000
1       -0.685039000      1.338733000     -1.578469000
1       -1.782609000      2.684164000     -1.288444000
6        1.826631000      0.347713000      1.050662000
1        2.456195000      0.827105000      1.785444000
6        0.828880000     -1.673015000      0.322296000
1        1.358380000     -2.544700000      0.743119000
6       -2.080270000     -0.485818000     -0.009383000
6       -0.462131000     -2.183991000     -0.299469000
1       -0.222436000     -2.833188000     -1.140236000
1       -1.048449000     -2.724595000      0.444950000
6       -2.559101000      0.801499000     -0.624915000
1       -3.296977000      1.234896000      0.050805000
1       -3.040584000      0.578596000     -1.579570000
8        1.657837000     -1.116709000     -0.711844000
8       -1.212807000     -1.101989000     -0.836236000
8       -2.387395000     -0.906587000      1.072523000
26
3BR-5b
8        1.745453000      1.345034000      0.171523000
8       -1.415470000      0.629893000     -0.989171000
8       -3.267145000     -0.654881000     -1.108936000
6        0.015491000     -1.729396000      0.552758000
1       -0.825542000     -2.413258000      0.549464000
6       -2.301040000     -0.041073000      1.009086000
1       -2.986086000     -0.534909000      1.682166000
6       -0.961674000      0.528372000      1.335052000
1       -0.967802000      1.169528000      2.219801000
6        0.026444000     -0.658717000      1.602807000
1       -0.312572000     -1.095599000      2.549756000
1        1.026683000     -0.266174000      1.787994000
6        1.119964000     -1.978139000     -0.421400000
1        2.007247000     -2.382224000      0.085798000
1        0.796318000     -2.729752000     -1.143290000
6       -0.778933000      1.385798000      0.057361000
1       -1.402756000      2.276359000      0.200960000
6       -2.447739000     -0.090687000     -0.439976000
6        0.581830000      1.909684000     -0.413305000
1        0.613318000      1.854232000     -1.503993000
1        0.651961000      2.960190000     -0.134034000
6        2.317714000      0.189761000     -0.249094000
8        3.376581000     -0.111098000      0.219874000
6        1.573630000     -0.720887000     -1.199444000
1        2.294985000     -1.019384000     -1.961811000
1        0.714768000     -0.258896000     -1.682204000
26
3BR-5b'
8        1.863276000      1.411484000      0.107999000
8       -1.590975000      1.472582000     -0.214197000
8       -2.816459000     -0.245163000     -0.951728000
6       -0.483490000     -1.852896000      0.237218000
1       -1.286992000     -2.581426000      0.058281000
6       -1.209549000     -0.607736000      0.847606000
1       -1.930550000     -0.995251000      1.579948000
6       -0.331633000      0.430430000      1.436366000
1        0.400611000      0.276100000      2.213552000
6        0.450544000     -2.418065000      1.255569000
1        0.091854000     -2.627150000      2.256267000
1        1.467454000     -2.679698000      1.000380000
6        0.184511000     -1.619208000     -1.136618000
1        0.943417000     -2.393242000     -1.268219000
1       -0.565599000     -1.769828000     -1.915925000
6       -0.536404000      1.727981000      0.731243000
1       -0.907884000      2.513589000      1.397369000
6       -1.991257000      0.171589000     -0.200469000
6        0.728289000      2.263237000      0.003598000
1        0.475213000      2.479384000     -1.036826000
1        1.057300000      3.187651000      0.474471000
6        1.877580000      0.150704000     -0.398175000
8        2.761062000     -0.585858000     -0.068874000
6        0.826092000     -0.249944000     -1.412936000
1        1.365446000     -0.323583000     -2.362697000
1        0.066389000      0.512538000     -1.562610000
26
3BR-5a
8        2.490334000      0.631342000     -1.337528000
6       -0.444529000      2.027289000      0.589305000
1       -1.164191000      2.268845000      1.364064000
6        0.740550000     -0.649313000      1.410331000
1        0.159988000     -0.672500000      2.319862000
6        0.996081000      1.912762000      0.954897000
1        1.623238000      2.501365000      0.272847000
1        1.148889000      2.310648000      1.959658000
6        1.954827000     -0.002258000     -0.481302000
6       -0.957938000      1.827391000     -0.799987000
1       -0.206289000      1.336831000     -1.425063000
1       -1.169841000      2.794698000     -1.275732000
6        1.579476000      0.471294000      0.921437000
1        2.538479000      0.517778000      1.462681000
6        0.798868000     -1.781293000      0.434920000
1        1.271451000     -2.680437000      0.850265000
6       -2.018725000     -0.313117000     -0.111944000
6       -0.549496000     -2.181669000     -0.161366000
1       -0.399518000     -2.932442000     -0.936322000
1       -1.215575000     -2.560323000      0.615104000
6       -2.259404000      0.998735000     -0.811727000
1       -3.056785000      1.516010000     -0.277675000
1       -2.576030000      0.810007000     -1.839694000
8        1.629032000     -1.307022000     -0.634710000
8       -1.119907000     -1.048019000     -0.804022000
8       -2.498467000     -0.659976000      0.931587000
26
1BR-5b
8       -1.712946000     -1.351062000      0.171124000
8        1.452311000     -0.589724000     -0.993660000
8        3.320378000      0.674664000     -1.068371000
6       -0.032651000      1.706116000      0.488858000
1        0.873430000      2.275470000      0.314053000
6        2.329006000      0.021060000      1.026164000
1        3.013893000      0.488940000      1.717595000
6        0.978108000     -0.526678000      1.320454000
1        0.951627000     -1.167957000      2.204029000
6       -0.008450000      0.677618000      1.572023000
1        0.356066000      1.137736000      2.498852000
1       -1.002763000      0.287947000      1.791668000
6       -1.208847000      1.974747000     -0.390377000
1       -2.070382000      2.326019000      0.192149000
1       -0.956198000      2.762693000     -1.100996000
6        0.803673000     -1.365426000      0.030589000
1        1.423458000     -2.259770000      0.165347000
6        2.490652000      0.101434000     -0.419274000
6       -0.555781000     -1.872004000     -0.464196000
1       -0.598507000     -1.748354000     -1.548206000
1       -0.615114000     -2.938778000     -0.252077000
6       -2.348393000     -0.220017000     -0.224170000
8       -3.402266000      0.033195000      0.282787000
6       -1.675024000      0.730581000     -1.188260000
1       -2.440218000      1.032361000     -1.904909000
1       -0.828870000      0.302528000     -1.723418000
26
1BR-5b'
8       -1.968414000     -1.306483000      0.093500000
8        1.479899000     -1.591681000     -0.184498000
8        2.830515000      0.025985000     -0.930443000
6        0.623485000      1.835041000      0.193666000
1        1.505746000      2.449297000     -0.018920000
6        1.227994000      0.527775000      0.838509000
1        1.962018000      0.877270000      1.576119000
6        0.266588000     -0.430831000      1.421677000
1       -0.490320000     -0.204193000      2.156944000
6       -0.211596000      2.545638000      1.202065000
1        0.260159000      3.007934000      2.060422000
1       -1.291790000      2.504129000      1.155896000
6       -0.099230000      1.625672000     -1.159620000
1       -0.826265000      2.432185000     -1.273267000
1        0.633883000      1.739605000     -1.961059000
6        0.397769000     -1.756015000      0.749304000
1        0.706703000     -2.548355000      1.439099000
6        1.968324000     -0.321126000     -0.185430000
6       -0.885663000     -2.225406000      0.008034000
1       -0.631575000     -2.459989000     -1.028171000
1       -1.274753000     -3.126649000      0.477545000
6       -1.874942000     -0.038181000     -0.382216000
8       -2.681690000      0.768484000     -0.019199000
6       -0.810824000      0.287922000     -1.410835000
1       -1.352805000      0.372888000     -2.358627000
1       -0.094917000     -0.517497000     -1.551779000
26
1BR-5a
8        2.568069000      0.463140000     -1.334130000
6       -0.314504000      2.004849000      0.580391000
1       -1.002504000      2.366575000      1.337103000
6        0.659294000     -0.611976000      1.394100000
1        0.091777000     -0.585241000      2.311803000
6        1.137110000      1.875436000      0.926525000
1        1.769754000      2.434639000      0.224699000
1        1.312154000      2.290405000      1.920760000
6        1.976974000     -0.111431000     -0.472935000
6       -0.839970000      1.835112000     -0.808398000
1       -0.130733000      1.279785000     -1.428387000
1       -0.970990000      2.813863000     -1.290964000
6        1.628559000      0.412053000      0.918486000
1        2.579352000      0.365516000      1.474957000
6        0.680652000     -1.783610000      0.463922000
1        1.106985000     -2.686576000      0.920587000
6       -2.059125000     -0.215614000     -0.119775000
6       -0.675839000     -2.146620000     -0.136491000
1       -0.545898000     -2.916585000     -0.895972000
1       -1.360298000     -2.488407000      0.641275000
6       -2.202132000      1.112172000     -0.816305000
1       -2.955979000      1.687658000     -0.278751000
1       -2.536523000      0.950135000     -1.843256000
8        1.548886000     -1.388466000     -0.608693000
8       -1.200344000     -1.005288000     -0.803339000
8       -2.579511000     -0.536136000      0.912289000
26
TS(1BR-5b-->20)
8        1.832692000      1.277253000      0.130541000
8       -1.342415000      0.758783000     -0.967223000
8       -3.119697000     -0.608740000     -1.187208000
6       -0.064426000     -1.694119000      0.736010000
1       -0.617902000     -2.556026000      1.091915000
6       -2.161342000     -0.134675000      0.967339000
1       -2.812319000     -0.719687000      1.599365000
6       -0.899833000      0.572985000      1.380206000
1       -1.031417000      1.226068000      2.247165000
6        0.107012000     -0.551450000      1.715535000
1       -0.174761000     -0.919129000      2.706845000
1        1.131200000     -0.188993000      1.805861000
6        0.776452000     -1.948178000     -0.476688000
1        1.643386000     -2.556080000     -0.175319000
1        0.203916000     -2.562957000     -1.177121000
6       -0.702291000      1.455123000      0.116567000
1       -1.303293000      2.357901000      0.278202000
6       -2.325562000     -0.063213000     -0.472965000
6        0.674011000      1.961191000     -0.327533000
1        0.668579000      2.039423000     -1.418163000
1        0.810016000      2.963484000      0.076708000
6        2.235051000      0.068264000     -0.332467000
8        3.280755000     -0.361296000      0.061013000
6        1.326489000     -0.727648000     -1.240857000
1        1.959801000     -1.096780000     -2.049111000
1        0.518753000     -0.144903000     -1.674215000
26
TS(1BR-5b'-->20)
8        1.763106000      1.339339000      0.151595000
8       -1.626843000      1.303078000     -0.430500000
8       -2.730350000     -0.501536000     -1.146558000
6       -0.342700000     -1.775571000      0.503676000
1       -0.844941000     -2.751141000      0.568035000
6       -1.352031000     -0.650049000      0.861297000
1       -2.144787000     -1.052582000      1.499146000
6       -0.600672000      0.480496000      1.502589000
1       -0.482111000      0.598951000      2.568345000
6        0.711953000     -1.660692000      1.571407000
1        0.401281000     -1.701260000      2.608431000
1        1.743472000     -1.911116000      1.356415000
6        0.253782000     -1.712769000     -0.913536000
1        1.043889000     -2.467483000     -0.958096000
1       -0.514484000     -2.003836000     -1.633204000
6       -0.695801000      1.678612000      0.603199000
1       -1.151479000      2.529291000      1.118373000
6       -2.008371000      0.000877000     -0.342557000
6        0.629730000      2.175996000     -0.027590000
1        0.451050000      2.390007000     -1.084412000
1        0.922873000      3.103245000      0.462122000
6        1.933650000      0.153897000     -0.481866000
8        2.955813000     -0.443322000     -0.302988000
6        0.847886000     -0.374149000     -1.397619000
1        1.346274000     -0.570649000     -2.349730000
1        0.070597000      0.356206000     -1.601813000
26
TS(1BR-5a-->19)
8        2.667496000      0.316829000     -1.326674000
6       -0.221418000      1.872796000      0.597702000
1       -0.896939000      2.159102000      1.397499000
6        0.608121000     -0.534867000      1.369935000
1        0.135728000     -0.513467000      2.341097000
6        1.257650000      1.841517000      0.876339000
1        1.836070000      2.377702000      0.114974000
1        1.466326000      2.309112000      1.840440000
6        2.022056000     -0.194626000     -0.464936000
6       -0.773121000      1.834090000     -0.790785000
1       -0.106513000      1.275197000     -1.454628000
1       -0.840238000      2.850073000     -1.206122000
6        1.705607000      0.374327000      0.915688000
1        2.635236000      0.256920000      1.494925000
6        0.588879000     -1.744995000      0.486320000
1        0.981409000     -2.639597000      0.989442000
6       -2.115054000     -0.140658000     -0.136201000
6       -0.772100000     -2.095145000     -0.108477000
1       -0.654289000     -2.887454000     -0.846655000
1       -1.464277000     -2.405035000      0.675841000
6       -2.176840000      1.200479000     -0.820464000
1       -2.898504000      1.813228000     -0.279989000
1       -2.513967000      1.072391000     -1.851096000
8        1.480466000     -1.428308000     -0.593598000
8       -1.273755000     -0.961672000     -0.804087000
8       -2.677048000     -0.445060000      0.878553000
26
20
8        1.900084000      1.129934000     -0.006218000
8       -1.431800000      1.149483000     -0.813335000
8       -2.674684000     -0.620829000     -1.362209000
6       -0.427251000     -1.464589000      0.946725000
1       -0.699291000     -2.381939000      1.469484000
6       -1.642541000     -0.483959000      0.836885000
1       -2.524482000     -0.812182000      1.383123000
6       -0.795440000      0.645429000      1.455193000
1       -1.235773000      1.190026000      2.288566000
6        0.253040000     -0.419462000      1.875372000
1        0.066712000     -0.683766000      2.917411000
1        1.313844000     -0.214909000      1.774669000
6        0.278286000     -1.887743000     -0.345711000
1        1.067363000     -2.593681000     -0.071983000
1       -0.441699000     -2.430632000     -0.964883000
6       -0.599396000      1.627856000      0.264135000
1       -1.039157000      2.588156000      0.540231000
6       -2.014353000     -0.046088000     -0.551863000
6        0.792751000      1.971732000     -0.301506000
1        0.683478000      2.100764000     -1.382298000
1        1.102436000      2.927747000      0.118715000
6        2.061686000     -0.129456000     -0.477764000
8        3.082472000     -0.697687000     -0.217131000
6        0.937307000     -0.805197000     -1.229223000
1        1.413847000     -1.321188000     -2.064334000
1        0.219612000     -0.106752000     -1.651018000
26
19
8        3.095737000     -0.336903000     -1.104774000
6        0.038732000      1.410672000      0.491327000
1       -0.601207000      1.992854000      1.158879000
6        0.420458000      0.029191000      1.180635000
1        0.119270000      0.033697000      2.227313000
6        1.536151000      1.816988000      0.569128000
1        1.980675000      2.211895000     -0.346279000
1        1.748801000      2.494285000      1.395668000
6        2.187167000     -0.462450000     -0.343843000
6       -0.536454000      1.496992000     -0.925251000
1       -0.046901000      0.778859000     -1.588421000
1       -0.318449000      2.496876000     -1.310627000
6        1.896692000      0.361445000      0.903843000
1        2.659960000      0.167851000      1.658970000
6        0.290916000     -1.379793000      0.584956000
1        0.674092000     -2.078446000      1.341516000
6       -2.290323000      0.031244000     -0.151591000
6       -1.046723000     -1.929476000      0.131262000
1       -0.890079000     -2.849707000     -0.429563000
1       -1.680856000     -2.124664000      0.997651000
6       -2.061899000      1.271726000     -0.959981000
1       -2.600066000      2.097319000     -0.494654000
1       -2.405478000      1.134243000     -1.986293000
8        1.217086000     -1.395665000     -0.515562000
8       -1.678756000     -1.016920000     -0.754343000
8       -2.790075000     -0.029798000      0.936296000
